# Supplementary material
Source: publisher figshare collection journal article supplement (https://sage.figshare.com/ndownloader/files/15618980)
Supplement: Supplementary file 1 [file 15618980]

**Supplementary Material**

**Questionnaire 1**

1. Your gender

- Male

- Female

- Prefer not to say

2. Your age group

- 18 years of younger

- 19 – 24

- 25 – 30

- 31 – 40

- 41 – 50

- 51 – 60

- 61 – 70

- 71 or over

- Prefer not to say

3. What country do you live in?

- (list of all countries to choose from)

4. Do you, or have you ever, worked in any animal or human health care profession, or are you studying to work in either of these fields in the future?

- Yes *

- No

- Prefer not to say

* 4.a. Please specify which profession(s) or study you are currently involved in or have been in the past.

- Breeder

- Rescue shelter worker

- Veterinarians

- Veterinary nurse/ technician

- Student veterinarian

- Student veterinary nurse/ technician

- Educator

- Industry

- Human health care professional

- Other (please specify)

5. What is the name of the diabetic cat you would like to tell us about?

If completing this questionnaire for a cat that is no longer alive, please enter (deceased) next to your cat’s name in the space below. For example, Sandy (deceased). If completing a questionnaire for a deceased cat, please answer questions considering your cat in the last month of their life when asked questions about how they are doing currently.

- (open answer)

6. Have you already filled in or are you planning on filling in another questionnaire for any other diabetic cat(s) you own/ have owned?

- Yes *

- No

* 6.a. Please list below all the names of other diabetic cats you have/ will give us information about. Please complete a separate questionnaire for each diabetic cat. Knowing which cats are in the same household will help us with our statistical analysis.

- (open answer)

7. What age is your cat?

- less than 5 years old

- 5 – 10 years old

- 11 – 15 years old

- More than 15 years old

- Don’t know *

* 7.a. Could you please estimate your cat’s age or give us an indication of their approximate age, e.g. elderly, middle aged, about 10 years old, etc.

- (open answer)

8. What gender is your cat?

- Male

- Neutered Male

- Female

- Neutered Female

9. Is your cat currently diabetic?

- Yes *

- No, my cat is in diabetic remission **

- N/A, my cat is no longer alive **

- Don’t know

- Other (please specify)

* 9.a. Approximately, when was your cat first diagnosed as having diabetes?

- Less than 1 month ago

- 1-3 months ago

- 4-12 months ago

- More than 1 year ago

- Don’t know

** 9.b. Approximately, how long was your cat diabetic for?

- Less than 1 month

- 1-3 months

- 4-12 months

- 1-3 years

- More than 3 years

- Don’t know

10. Please insert any comments you think relevant here (optional):

- (open answer)

11. Since your cat was diagnosed with diabetes, how helpful have you found the different sources of information listed below on a scale of 1 – 5 (1 = very helpful, 2 = slightly helpful, 3 = neither helpful nor unhelpful, 4 = poor, 5 = very poor, N/A = I did not receive this support)?

- Verbal discussions with my veterinarian (in person or by phone)

- Verbal discussions with a veterinary technician/ nurse (in person or by phone)

- Printed literature provided by my veterinary clinic, e.g. leaflet, print out from website

- Recommended websites provided by my veterinary clinic

- Chat room/ online forum recommended by my veterinary clinic

- Discussion with family members or friends

- Books about feline diabetes mellitus

- Magazines for pet owners

- Websites I have found

- Chat room/ online forum I have found

11.a. If you found or were supplied alternative sources of information that are not listed above, please specify these below and tell us how helpful you found them to be on a scale of 1-5 as above

- (open answer)

12. When considering the last few appointments, how easy was it for you to take your cat to the veterinary clinic for appointments concerning his/ her diabetes?

- 1 (very straightforward)

- 2

- 3

- 4

- 5 (very inconvenient)

12.a. Please tell us what factors, if any, make a visit to your veterinary clinic difficult or inconvenient (optional):

- (open answer)

13. When your cat was first diagnosed with diabetes, which of the following did your veterinarian discuss with you? Please select “yes” for topics which were discussed with you; “no” for topics which were not discussed with you; or “not sure” if you cannot remember.

- What diabetes mellitus is and how it arises

- Weight management: achieving/ maintaining a healthy weight

- Changing my cat’s food to a special diet for management of diabetes

- Specific food supplements for diabetes

- Oral medications aimed at treating my cat’s diabetes (e.g. Glipizide)

- Insulin administration

- How often my cat will need clinic visits for checkups and/or blood glucose monitoring

- Home urine glucose (+/- ketone) monitoring

- Home blood glucose monitoring

- The amount of time needed to take care of my diabetic cat

- Clinical remission and why it can occur in cats

- How to recognize signs of low blood glucose levels (hypoglycemia)

- What to do if my cat developed low blood glucose levels (hypoglycemia)

- Prognosis and how to recognize if my cat is really unwell

14. Overall, when your cat’s diabetes was first diagnosed, how confident were you with the advice given by your veterinarian concerning management of your diabetic cat?

- 1 (I felt confident and fully informed)

- 2

- 3

- 4

- 5 (I did not feel confident/ informed at all)

* 14.a. What more information or advice, if any would you have liked to receive (optional)?

- (open answer)

15. Overall, when your cat’s diabetes was first diagnosed, how confident were you about recognizing the signs of hypoglycemia in your cat and knowing what to do if this were to happen?

- 1 (very confident)

- 2

- 3

- 4

- 5 (not confident at all)

* 15.a. Please tell us what, if anything, would have helped to increase your confidence regarding recognition and management of hypoglycemia (optional):

- (open answer)

16. Concerning the main reason(s) for the choice of treatment for your cat, please rate how important each factor was in the decision making process based on a scale from 1 – 4 (1 = extremely important, 2 = very important, 3 = quite important, 4 = not important, N/A = this reason is not applicable to me):

- the veterinarian’s recommendation

- consideration of my work schedule/ hours spent at home

- ability to make treatment arrangements for my cat when I am away/ travelling

- ease of treatment administration

- costs of treatment at home (e.g. insulin, syringes, needles, diet, etc.)

- costs of veterinary visits

- what is best for my cat

- fear of giving injections

- number of individuals available or willing to give injections

- concerns regarding my cat’s reaction to treatment

16.a. If a factor other than those listed above were important to you, please list these below indicating how important they were to you in the decision-making process on a scale from 1 – 4, as above:

- (open answer)

17. Do you have pet insurance for your cat?

- Yes

- No

- prefer not to say

18. Which treatment(s) has your cat received to control his/ her diabetes?

Please tick all of the treatments that your cat has received throughout the course of their diabetes and not just what they are receiving currently. It is especially important to tick one of the insulin boxes (as appropriate) if your cat has received insulin at any time in their treatment as this will lead to you being asked more questions about insulin in your cat, later in this survey. You can add more information to clarify by also selecting 'other' and entering information in the text box. Thank you!

- once daily insulin injection *

- twice daily insulin injections *

- three times daily insulin injections *

- oral drugs to lower blood sugar (hypoglycemic drugs) #

- food supplements for the management of diabetes (e.g. chromium or acarbose gel)

- a special diet prescribed by my veterinarian for the management of diabetes (e.g. Hill’s md/ Purina DM) %

- I chose to have my cat euthanized (put to sleep) because, given the circumstances, I thought it was the best thing to do for him/ her

- Other (please specify)

* 18.a. Which type of insulin did you or do you currently give to your cat?

- Neutral Protamine Hagedorn (also known as NPH or Isophane)

- Lente Insulin (also known as Caninsulin or Vetsulin)

- Protamine Zinc Insulin (also known as PZI or ProZinc)

- Ultralente

- Insulin Glargine (also known as Lantus)

- Insulin Detemir (also known as Levemir)

- A mixture of insulin types (please specify below)

- Other (please specify)

* 18.b. If a mixture of insulin types, please specify here:

- (free answer)

* 18.c. Have you ever injured yourself when injecting your cat with insulin, i.e. stuck the needle into yourself or someone holding your cat?

- Yes +

- No

+ 18.d. Which injection equipment were you using when you injured yourself administering the insulin?

- Insulin needle & syringe (the syringe comes with the tiny needle already attached)

- Separate needles & syringe

- Insulin pen (e.g. VetPen)

- Other (please specify)

+ 18.e. How often has this occurred?

- Only once

- Very rarely (on 2-5 occasions)

- Occasionally (on 6-9 occasions)

- Often (on 10 or more occasions)

+ 18.f. Please tell us anything else you think might be relevant (optional):

- (open answer)

* 18.g. Which method(s) of insulin administration have you used in your cat? Please tick all that apply.

- Insulin needle & syringe (the syringe comes with the tiny needle already attached)

- Separate needle and syringe (not specific for insulin injections)

- Insulin pen (e.g. Caninsulin VetPen) ^

^ 18.h. Have you ever used a traditional needle and syringe to administer insulin before switching over to the Caninsulin VetPen?

- Yes @

- No

@ 18.i. How does the use of the insulin pen compare to the use of the insulin needle and syringe? Please rate the following statements on a scale of 1-5 (1 = strongly agree, 2 = agree, 3 = neither agree nor disagree, 4 = disagree, 5 = strongly disagree).

- it is easier for me to administer the injection with the insulin pen

- the two methods of administration are equally easy for me to do

- it is easier for me to administer the injection with a traditional insulin needle and syringe

- I like that I do not have to draw up the insulin when using the insulin pen

- my cat is more relaxed with the insulin pen than with the insulin needle & syringe

- it does not make a difference to my cat which method I use

- my cat is more relaxed with the traditional insulin needle & syringe than with the insulin pen

@ 18.j. Please tell us more about your experience of using a VetPen here (optional):

- (open answer)

* 18.m. How difficult was it for you to draw up the correct amount of insulin into the syringe the very first time you had to do it?

- 1 (not difficult at all)

- 2

- 3

- 4

- 5 (very difficult)

- Not applicable – I use a VetPen

* 18.n. Please tell us what, if anything, you found difficult about this procedure when you first did it (optional):

- (open answer)

* 18.o. How difficult did you find drawing up the correct amount of insulin into the syringe the last time you did this?

- 1 (not difficult at all)

- 2

- 3

- 4

- 5 (very difficult)

- Not applicable – I use a VetPen

- Not applicable as I was still “new” to drawing up insulin

* 18.p. Please tell us about any advice you may have for owners new to drawing up insulin for their cat (optional):

- (open answer)

* 18.q. How difficult was it for you to administer the insulin injection to your cat the very first time you had to do it?

- 1 (not difficult at all)

- 2

- 3

- 4

- 5 (very difficult)

* 18.r. Please tell us what, if anything, you found difficult about this procedure when first doing it (optional):

- (open answer)

* 18.s. How difficult did you find the administration of insulin to your cat the last time you had to do this?

- 1 (not difficult at all)

- 2

- 3

- 4

- 5 (very difficult)

- Not applicable as I am still “new” to drawing up insulin

* 18.t. Please tell us any advice you have for owners new to injecting their cats with insulin (optional):

- (open answer)

* 18.u. How long did it take you to feel comfortable giving insulin injections to your cat?

- Less than 1 week

- 1-2 weeks

- 2-4 weeks

- I am still not comfortable giving insulin injections

- Other (please specify)

* 18.v. At the time your cat needed insulin injections to manage their diabetes, how many people in your household (including yourself)/ your circle of friends/ neighbours/ etc. were able or willing to give your cat insulin injections?

- 1

- 2

- 3 or more

* 18.w. Please tell us what the veterinary professionals at your clinic taught you about insulin when this was first prescribed for your diabetic cat? Please select “yes” for topics which were discussed with or demonstrated to you; “no” for topics which were not discussed/ demonstrated to you; or “not sure” if you cannot remember.

- I was told how to store my cat’s insulin

- I was shown how to mix insulin in its bottle prior to drawing it up with a needle and syringe

- I was shown how to draw up the insulin by a veterinarian or veterinary nurse/ technician

- I received verbal instructions on how to mix and draw up the insulin

- I was shown how to use a VetPen or other insulin gun device

- I drew up the insulin (or saline if my cat was not due to have his/her insulin) and gave my cat the injection while a veterinarian/ vet nurse/ technician watched me do it

- I was shown how to give the insulin injection by a veterinarian or veterinary nurse/ technician

- I received verbal instructions on how to give the insulin injection

* 18.x. When considering the first week that you administered insulin to your diabetic cat, please indicate how they reacted to their insulin injection (please tick all that apply):

- calm/ my cat does not seem to have a problem with the injections

- slightly troubled/ not very keen at first but my cat lets me do it anyway

- anxious/ my cat runs away or hides

- stressed/ panting/ shows signs of pain

- angry/ aggressive/ tries to bite/ vocalizes/ growls

- other (please specify)

* 18.y. When considering the last week that you administered insulin to your diabetic cat, please indicate how they reacted to their insulin injection (please tick all that apply):

- calm/ my cat does not seem to have a problem with the injections

- slightly troubled/ not very keen at first but my cat lets me do it anyway

- anxious/ my cat runs away or hides

- stressed/ panting/ shows signs of pain

- angry/ aggressive/ tries to bite/ vocalizes/ growls

- other (please specify)

# 18.z. How difficult is it for you to give your cat a tablet orally directly (rather than in food)?

- 1 (not difficult at all)

- 2

- 3

- 4

- 5 (very difficult)

- Not applicable as I just put the tablet in my cat’s food and hope that he/ she will eat it

# 18.z.a. Please comment on any difficulties, where applicable, you have experienced when giving your cat a tablet (optional):

- (open answer)

% 18.z.b. How difficult was it for you to switch your cat over to the new diet?

- 1 (not difficult at all)

- 2

- 3

- 4

- 5 (very difficult)

% 18.z.c. Please comment on any difficulties experienced, where applicable, due to the diet switch (optional):

- (open answer)

% 18.z.d. Please specify which diet you currently feed your cat:

- Purina DM

- Hill’s m/d

- Home cooked diet: high fiber, low carbohydrate

- Home cooked diet: high protein, low carbohydrate

- Other (please specify)

% 18.z.e. Is your cat still eating the diet it was prescribed?

- Yes

- Some of the time

- No

% 18.z.f. Please feel free to tell us more about this (optional):

- (open answer)

18.k. Before your cat was diagnosed with diabetes, had you ever used a needle/ syringe to draw up/ administer a drug for any other reason?

- Yes

- No

- Prefer not to say

18.l. Do any other people in your household, including yourself, cats, or dogs, have diabetes requiring regular insulin injections?

- Yes

- No

- Prefer not to say

19. Concerning the method(s) you use/ used to monitor your cat at home, please rate how helpful you find each method in indicating whether your cat’s diabetes is under control on a scale of 1-5 (1 = very helpful, 2 = slightly helpful, 3 = neither helpful nor unhelpful, 4 = poor, 5 = very poor):

- my cat’s general demeanor (e.g. depressed, bright, alert, etc.)

- appetite or food intake

- water intake

- body weight

- amount of urine produced each day

- frequency of urination each day

- home blood glucose monitoring

- home urine glucose monitoring using a dipstick test

- home urine glucose monitoring using special cat litter

19.a. If you use methods other than those listed above to monitor your diabetic cat, please tell us about these below, indicating how helpful you find these methods on a scale from 1-5 as above (optional):

- (open answer)

20. Do you, or have you ever, monitored your cat’s blood glucose levels at home using a glucometer?

- Yes *

- No

* 20.a. On average, how often do you/ did you measure your cat’s blood glucose levels at home?

- Once or more times every day

- several times a week

- Once a week

- Several times a month

- Once a month

- Several times a year

- Once a year

- Only when the veterinarian asks me to do so

- Other (please specify)

* 20.b. Who suggested home monitoring of blood glucose levels to you?

- my veterinarian

- a veterinary nurse/ technician at my veterinary clinic

- a friend/ family member

- advice from the internet or an online chat room

- my previous experience

- other (please specify)

* 20.c. How difficult did you find the use of the glucometer when you first started to do this?

- 1 (not difficult at all)

- 2

- 3

- 4

- 5 (very difficult)

* 20.d. Please tell us the main problems/ concerns you experienced, where applicable (optional):

- (open answer)

* 20.e. On the last few occasions on which you used the glucometer, how difficult did you find its use?

- 1 (not difficult at all)

- 2

- 3

- 4

- 5 (very difficult)

- not applicable because I am still quite “new” to using this device

* 20.f. Approximately, how long have you been using a glucometer?

- Less than 1 month

- 1-2 months

- 2-3 months

- more than 3 months

- don’t know

* 20.g. Which part of your cat’s body do you find is easiest to collect the blood sample from?

- vein on the edge of the ear

- middle area of the ear

- a foot pad

- any of the above

- other (please specify)

* 20.h. Please tell us any advice you have for owners new to this technique (optional):

- (open answer)

* 20.i. Do you adjust your cat’s insulin dose according to the glucose measurements you obtain at home?

- Yes

- No

- N/A as I don’t give my cat insulin injections

- Other (please specify)

21. Below follows a series of questions – we will ask first about how you felt when your cat was first diagnosed with diabetes, then ask the same questions again, but asking how you feel now. For deceased cats, please answer considering the last month of their lives; for cats that are no longer diabetic please answer considering the last month that they were diabetic:

Please rate the following statements based on whether you agree or disagree with them on a scale from 1-5 (1 = strongly agree, 2 = agree, 3 = neither agree nor disagree, 4 = disagree, 5 = strongly disagree). Please rate these statements when considering your cat when they were first diagnosed with diabetes.

- I was worried that my cat’s treatment would alter my relationship with him/ her

- I was concerned that treating my cat daily would interfere with my dialy life

- I thought the costs of treating my cat for diabetes would be high

- I thought I would find it difficult to arrange for someone to take care of my cat when I am traveling/ away

21.a. If you were worried that your cat’s treatment would alter your relationship with them, what was your main concern? (optional):

- (open answer)

22. Below are the same questions – but we would like to know how you feel now:

Please rate the following statements based on whether you agree or disagree with them on a scale from 1-5 (1 = strongly agree, 2 = agree, 3 = neither agree nor disagree, 4 = disagree, 5 = strongly disagree, N/A). Please rate these statements when considering your cat now (for deceased cats, please answer considering the last month of their lives; for cats that are no longer diabetic, please answer considering the last month that they were diabetic):

- My cat’s treatment has altered my relationship with him/ her

- treating my cat daily interferes with my daily life

- the costs of treating my cat for diabetes are high

- I do find it difficult to arrange for someone to take care of my cat when I am traveling/ away

- I think my cat’s diabetes is well controlled with its current treatment plan

22.a. If your relationship with your cat has changed as a result of treating their diabetes, has it changed for the better or worse? (optional)

- (open answer)

23. Please let us know if you believe that there is anything that could be changed about your cat’s diabetic treatment or management that would improve both your and your cat’s quality of life (optional).

- (open answer)

24. If you had another cat diagnosed with diabetes, would you choose to treat them the same way again?

- Yes

- to some extent

- no

24.a. What, if anything, would you do differently for another diabetic cat (optional):

- (open answer)

**Questionnaire 2**

I. General Information

1. Your gender: (drop-down menu)

□ Female

□ Male

□ Prefer not to say

2. Your age group: (drop-down menu)

□ 19 - 24

□ 25 – 30

□ 31 – 40

□ 41 – 50

□ 51 – 60

□ 61 – 70

□ 71 or over

□ Prefer not to say

3. Which country do you currently live in? (drop-down menu)

□ United Kingdom

□ …

□ Prefer not to say

II. Information about your cat

4. What is the name of the diabetic cat you would like to tell us about? (If this cat has died, please enter (deceased) next to your cat’s name in the space below. For example, Sandy (deceased). If completing a questionnaire for a deceased cat, please answer questions considering your cat in the last month of their life when asked questions about how they are doing currently).

(free text)

5. What gender is your cat?

□ Female

□ Neutered female

□ Male

□ Neutered male

6. What age is your cat (or was your cat when it died?)

□ Less than 5 years old

□ 5 - 10 years old

□ 11 - 15 years old

□ More than 15 years old

□ Don’t know * (leads to next question)

6a. If you don’t know please estimate your cat’s age or give us an indication of their approximate age e.g. elderly, middle aged, about 10 years old, etc.

(free text)

7. Approximately how long ago was your cat first diagnosed as having diabetes?

□ Less than 1 month ago

□ 1-3 months ago

□ 4-12 months ago

□ From 1-2 years ago

□ From 2-3 years ago

□ From more than three years ago

□ Don’t know

Feel free to enter additional info here (free text box)

8. Is your cat still diabetic?

□ Yes

□ No * (This will trigger the following question to appear)

□ Don’t know

□ Other (please specify): (free text)

* 8.a. Approximately, how long was your cat diabetic for?

□ Less than 1 month

□ 1-3 months

□ 4-12 months

□ 1 year

□ 2 years

□ 3 years or more

□ Don’t know

□ Other (free text box)

Please insert any comments you think relevant here (optional):

(free text)

III. Decision making at time of diagnosis

9. When your cat was diagnosed with diabetes, did you find the different sources of information listed helpful? Yes, No or N/A = Never use or received.

9.a. Verbal discussions with my veterinarian (in person or by phone)

□ Yes □ No □ N/A

9.b. Verbal discussions with a veterinary technician/ nurse (in person or by phone)

□ Yes □ No □ N/A

9.c. Printed literature provided by my veterinary clinic e.g. leaflet, print out from website

□ Yes □ No □ N/A

9.d. Websites, chat room/ online forum recommended by my veterinary clinic

□ Yes □ No □ N/A

9.e. Discussions with family members or friends

□ Yes □ No □ N/A

9.f. Books about feline diabetes mellitus

□ Yes □ No □ N/A

9.g. Magazines for pet owners

□ Yes □ No □ N/A

9.h. Websites, chat room/ online forum I have found

□ Yes □ No □ N/A

9.i. Other (please specify): (free text)

If yes please tell us which particular site(s) you have found the most helpful whether recommended by a veterinarian, anyone else, or you found yourself.

(free text)

10. When deciding how to treat your cat, please state which of the factors below were particularly important. Yes, No or N/A = this reason is not applicable to me. Other potential factors are discussed in question 11.

10.a. The veterinarian’s recommendation

□ Yes □ No □ N/A

10.b. Ease of treatment administration

□ Yes □ No □ N/A

10.c. Fear of giving injections

□ Yes □ No □ N/A

10.d. What is best for my cat

□ Yes □ No □ N/A

10.e. Other (free text)

Below are a series of questions about other factors that may have influenced your decision making. Please answer these statements Yes or No when considering your cat when it was FIRST diagnosed with diabetes.

Question 11 Yes No

I was worried that my cat’s treatment would negatively impact my relationship with him/her.

I was concerned that treating my cat daily would interfere with my daily life and take too much time.

I thought the costs of treating my cat for diabetes would be high.

I thought I would find it difficult to arrange for someone to take care of my cat when I am traveling / away.

Below are similar questions – but we would like to know how you feel NOW:

Question 12

My cat’s treatment has negatively altered my relationship with him/her.

Treating my cat daily has interfered with my daily life and takes too much time.

I have found the cost of treating my cat for diabetes high.

I have found it difficult to arrange for someone to take care of my cat when I am traveling/ away.

Please feel free to enter additional information here:

13. Which treatment(s) does your cat currently receive to control his/her diabetes (please tick ALL that apply.)

□ Insulin (if chosen prompts questions below)

13.a. □ Once daily insulin injection

13.b. □ Twice daily insulin injections

13.c. □ Three times daily insulin injections

□ Variable dosing, i.e. the amount and frequency of daily insulin injections depends on blood glucose measurements so may vary from one day to the next

□ Oral drugs to lower blood sugar (hypoglycemic drugs)

□ Food supplements for the management of diabetes (e.g. chromium or acarbose gel)

□ A special diet prescribed by my veterinarian for the management of diabetes (e.g. Hill’s m / d, Purina DM)

□ I chose to have my cat euthanized (put to sleep) because given the circumstances, I thought it was the best thing to do for him/her

□ Other (please specify): (free text)

IV. Monitoring your diabetic cat

14. When monitoring your cats diabetes at home, which of the following methods have you or do you use? Please tick ALL that apply.

Yes No

My cat’s general demeanor (e.g. depressed, bright, alert, etc.)

Appetite / food intake

Water intake

Bodyweight

Amount of urine produced each day (for example weighing the litter box)

Home urine glucose monitoring – using a dipstick test

Home urine glucose monitoring – using special cat litter

15. Do you monitor your cat’s glucose at home? Yes prompts questions 15 a-e

□ Yes □ No

* 15.a. On average, how often do you currently measure your cat’s blood glucose levels at home?

□ Once or more times every day

□ Several times a week

□ Once a week

□ Several times a month

□ Once a month

□ Only when the veterinarian asks me to do so

□ Other (please specify): (free text)

* 15.b. How difficult did you find home monitoring your cat’s blood glucose when you first started to do this?

□ 1 (very easy)

□ 2 (easy)

□ 3 (not easy nor difficult)

□ 4 (difficult)

□ 5 (very difficult)

* 15.c. Please tell us the main problems/concerns you experienced, where applicable (optional):

(free text)

* 15.d. Which part of your cat’s body do you find is easiest to collect the blood sample from?

□ Vein on the edge of the ear

□ Middle area of the ear

□ Foot pad

□ Any of the above

□ Other (please specify): (free text)

*15.e. Please tell us any advice you have for owners new to this technique (optional):

(free text)

16. When your cat’s diabetes was first diagnosed, how confident were you about recognizing the signs of low blood glucose levels (hypoglycemia) in your cat and knowing what to do if this were to happen:

□ 1 (very confident)

□ 2 (confident)

□ 3 (neutral)

□ 4 (not confident)

□ 5 (not confident at all)

17. Do you feel you have been able to control your cat’s diabetes?

□Yes □No □No longer applicable

Please feel free to tell us more here:

18. What factor(s) do you feel has played the most significant role in controlling your cat’s diabetes? This can be insulin, diet, supplements, blood glucose monitoring etc.

(free text)

19. Please let us know if you believe that there is anything that could be changed about your cat’s diabetic treatment or management that would improve both your and your cat’s quality of life (optional):

(free text)

20. If you had another cat diagnosed with diabetes, would you choose to treat them the same way again?

□ Yes

□ To some extent

□ No

20a. What, if anything, would you do differently for another diabetic cat? (optional):

(free text)

* Lastly, how did you hear about this survey?

□ Cat Professional website

□ E-mail from Cat Professional/Vet Professionals

□ Your Cat Magazine

□ Vet Professionals Twitter account

□ Word of mouth

□ From my veterinary practice

□ Facebook

□ Feline Diabetes Message Board

□ Other (please state)

**Number of respondents per country (n = 748)**

| Australia | 18 |
| --- | --- |
| Bahrain | 1 |
| Belgium | 5 |
| Brazil | 1 |
| Bulgaria | 2 |
| Canada | 51 |
| Finland | 1 |
| France | 6 |
| Germany | 3 |
| Indonesia | 1 |
| Ireland | 9 |
| Israel | 1 |
| Italy | 1 |
| Japan | 1 |
| Mexico | 1 |
| New Zealand | 3 |
| Netherlands | 45 |
| Norway | 2 |
| Portugal | 1 |
| Serbia & Montenegro | 1 |
| Slovenia | 1 |
| Spain | 3 |
| South Africa | 1 |
| Switzerland | 1 |
| United Arab Emirates | 1 |
| United Kingdom | 268 |
| United States | 319 |

**Comparison of carbohydrate, protein, and fat contents of several veterinary prescription and feline maintenance diets (% Metabolisable Energy (ME))**

|  | ME from carbohydrates | ME from protein | ME from fat |
| --- | --- | --- | --- |
| Purina Proplan Veterinary Diets Feline DM - canned | 7% | 46% | 47% |
| Purina Proplan Veterinary Diets Feline DM - dry | 20% | 44% | 36% |
| Hill’s m/d Feline - canned | 14% | 43% | 43% |
| Hill’s m/d Feline - dry | 15% | 43% | 42% |
| Hill’s w/d Feline - canned | 24% | 38% | 38% |
| Hill’s w/d Feline - dry | 37% | 41% | 22% |
| Royal Canin Diabetic Feline - canned | 15% | 47% | 38% |
| Royal Canin Diabetic Feline - dry | 26% | 45% | 29% |
| Applaws Pate (all flavours) | 0% | 43% | 57% |
| Applaws Wholesome with Salmon in Jelly | 0% | 86% | 14% |
| Lily’s Kitchen Classic Chicken Dinner - canned | 0% | 43% | 57% |
| Lily’s Organic Fish - canned | 0% | 40% | 60% |
| Lily’s Kitchen Marvelously Mature - dry | 39% | 30% | 32% |
